# Supplementary material for: Plastid RNA editing reduction accompanied with genetic variations in Cymbidium, a genus with diverse lifestyle modes
Source: PubMed Central journal article supplement — Plant Divers. 2021 Jul 12;44(3):316–21. doi: 10.1016/j.pld.2021.07.002 (PMC9209865; doi:10.1016/j.pld.2021.07.002), 2021-07-12
Supplement: mmc2.pdf [file mmc2.pdf]

Fig. S1

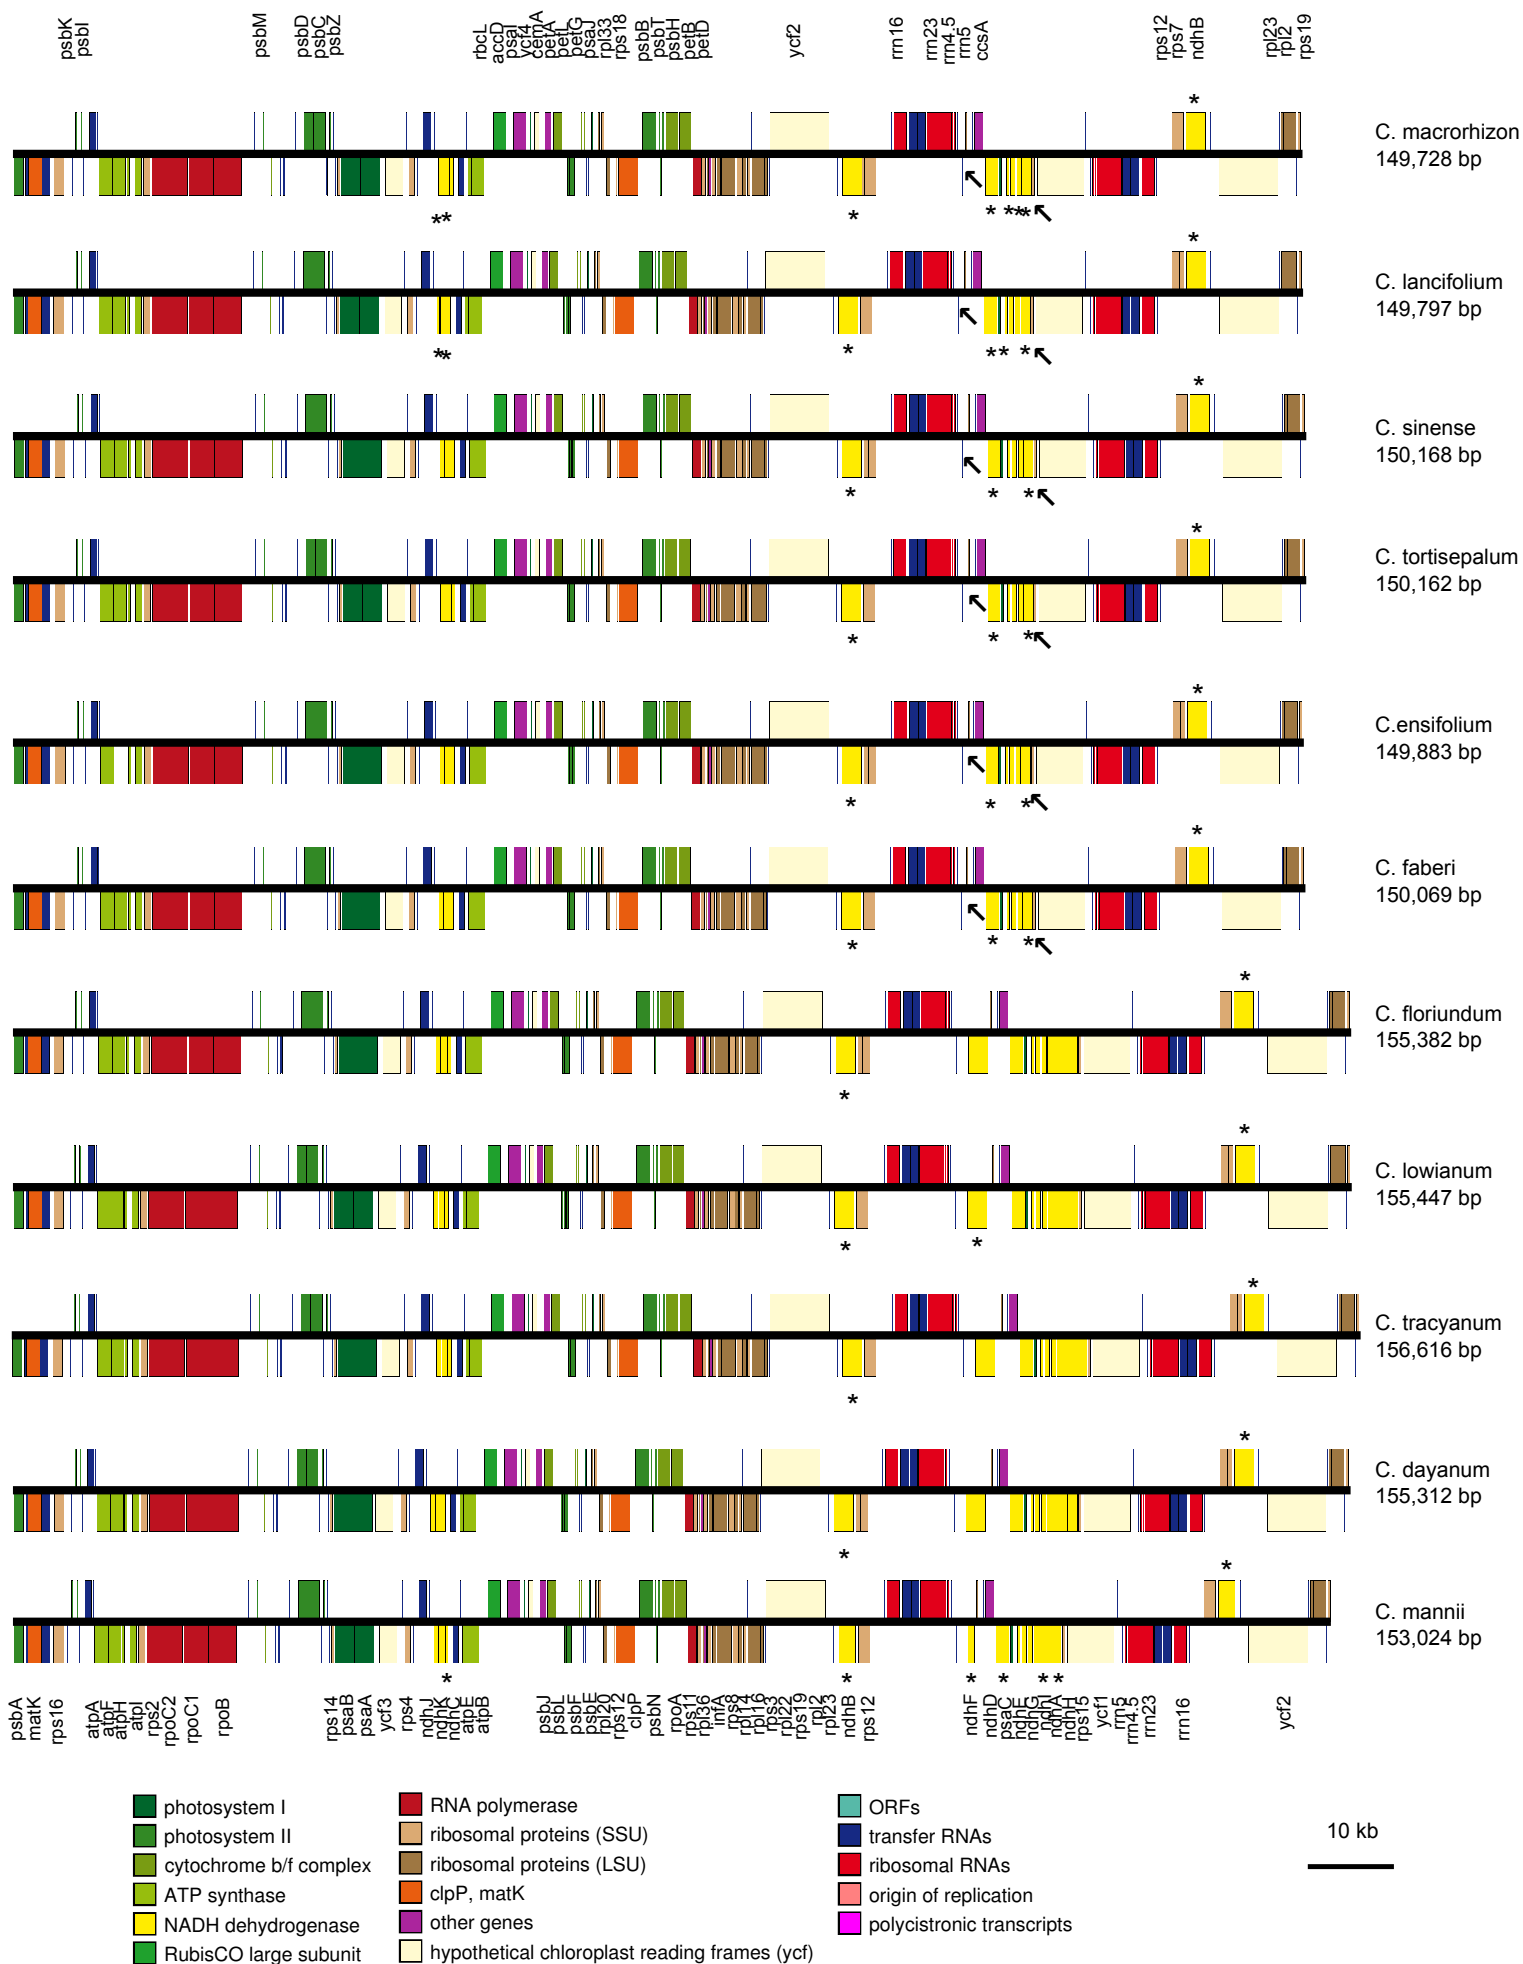



**Fig. S2 (continue)**

|             |   |   |   |   |   |   |   |   |   |   |   |
|-------------|---|---|---|---|---|---|---|---|---|---|---|
| petL_c5     | C | C |   |   | C | C |   |   |   | C |   |
| petL_c44    | C | C |   | C | C | C |   | C |   | C | C |
| petL_c56    | C | C |   |   |   | C |   |   |   | C |   |
| psaI_c80    |   | C |   |   |   |   |   | C |   |   |   |
| psbB_c414   | C | C | C |   | C | C | C |   | C | C | C |
| psbF_c77    |   |   |   |   |   |   |   |   |   |   |   |
| psbJ_c59    |   |   | C | C | C | C |   |   | C | C |   |
| rpl2_c183   | C |   | C | C | C | C |   | C |   |   | C |
| rpl16_c12   | C |   |   |   |   |   |   |   |   | C |   |
| rpl20_c335  | C | C | C | C |   |   | C | C |   | C |   |
| rpl20_c352  | C | C |   |   |   |   | C | C | C | C | C |
| rpl22_c46   | C | C | C |   | C | C | C |   | C | C | C |
| rpl23_c71   |   |   |   |   |   |   |   |   |   |   |   |
| rpl23_c89   | C | C | C | C | C | C | C |   |   | C | C |
| rpoA_c200   | C |   |   |   |   |   |   |   |   |   |   |
| rpoA_c368   |   | C |   |   |   | T |   |   |   |   |   |
| rpoA_c830   |   |   | C |   |   |   |   |   |   |   |   |
| rpoB_c29    |   |   |   |   |   |   |   |   |   |   |   |
| rpoB_c338   |   |   |   |   |   |   |   |   |   |   |   |
| rpoB_c473   |   |   |   |   |   |   |   |   |   |   |   |
| rpoB_c551   |   |   |   |   |   |   |   |   |   |   |   |
| rpoB_c623   |   |   |   |   |   |   |   |   |   |   |   |
| rpoB_c2426  |   |   |   |   |   |   |   |   |   |   |   |
| rpoC1_c41   |   |   |   |   |   |   |   |   |   |   |   |
| rpoC1_c500  | C | C | C | C | C | C | C |   |   |   |   |
| rpoC1_c629  |   |   |   |   |   |   |   |   |   |   |   |
| rpoC1_c647  |   |   |   |   | A |   |   |   |   |   |   |
| rpoC2_c2825 | C |   |   |   |   |   |   |   |   |   |   |
| rps12_c221  |   |   |   |   |   |   |   |   |   |   |   |
| rps14_c149  |   |   |   |   |   |   |   |   |   |   |   |
| rps16_c143  |   |   |   |   |   |   |   |   |   |   |   |
| rps2_c134   |   |   |   |   |   |   | T |   |   |   |   |
| rps3_c583   |   |   |   |   |   |   |   |   |   |   | C |
| rps7_c253   |   |   |   |   |   |   |   |   |   |   |   |
| rps8_c182   |   |   |   |   |   |   |   | C |   |   |   |
| yef1_c5336  |   |   |   |   |   |   |   |   |   | C |   |
| yef3_c44    |   |   |   |   |   |   |   |   |   |   |   |
| yef3_c185   |   |   |   |   |   |   |   |   |   |   |   |
| yef3_c191   |   |   |   |   |   |   |   |   |   |   |   |
| yef4_c254   | C |   |   |   |   | C |   |   |   |   | C |

Fig. S3

|            | <i>C. mac</i> | <i>C. lan</i> | <i>C. sin</i> | <i>C. tor</i> | <i>C. ens</i> | <i>C. fab</i> | <i>C. flo</i> | <i>C. low</i> | <i>C. tra</i> | <i>C. day</i> | <i>C. man</i> |
|------------|---------------|---------------|---------------|---------------|---------------|---------------|---------------|---------------|---------------|---------------|---------------|
| accD_c1367 | 0.94          | 0.89          | 0.92          | 0.93          | 0.89          | 0.94          | 0.96          | 0.91          | 0.93          | 0.95          | -             |
| atpA_c773  | 0.91          | 0.92          | 0.88          | 0.93          | 0.95          | 0.96          | 0.99          | 0.98          | 0.98          | 0.99          | 0.86          |
| atpA_c914  | 0.85          | 0.88          | 0.98          | 0.93          | 0.93          | 0.97          | 0.98          | 0.98          | 0.99          | 0.97          | 0.9           |
| atpA_c1148 | 0.77          | 0.86          | 0.97          | 0.88          | 0.88          | 0.95          | 0.98          | 0.97          | 0.96          | 0.96          | 0.88          |
| atpB_c1184 | 0.89          | 0.95          | 0.91          | 0.94          | 0.93          | 0.94          | 0.94          | 0.96          | 0.97          | 0.96          | -             |
| atpF_c92   | 0.87          | 0.95          | 0.93          | 0.89          | 0.79          | 0.85          | 0.7           | 0.84          | 0.93          | 0.83          | 0.97          |
| atpI_c428  | 0.97          | 0.98          | 0.98          | 0.99          | 0.99          | 0.98          | 0.9           | 0.98          | 0.98          | 0.99          | 0.99          |
| atpI_c540  | -             | 0.75          | 0.25          | 0.67          | 0.7           | 0.76          | 0.71          | 0.65          | 0.84          | 0.85          | 0.6           |
| atpI_c629  | 0.95          | 0.98          | 0.98          | 0.98          | 0.97          | 0.99          | 0.99          | 0.99          | 0.99          | 0.99          | 0.99          |
| clpP_c79   | 0.98          | 0.95          | 0.88          | 0.95          | 0.94          | 0.98          | 0.97          | 0.97          | 0.93          | 0.98          | 0.88          |
| clpP_c556  | 0.81          | 0.91          | 0.93          | 0.97          | 0.95          | 0.96          | 0.92          | 0.93          | 0.88          | 0.91          | 0.7           |
| matK_c490  | 0.86          | 0.9           | 0.43          | 0.2           | 0.64          | 0.67          | 0.45          | -             | 0.9           | 0.86          | 0.3           |
| matK_c746  | 0.39          | 0.72          | 0.26          | 0.34          | 0.36          | -             | 0.73          | 0.55          | 0.89          | 0.75          | 0.86          |
| matK_c931  | 0.32          | -             | 0.46          | 0.54          | 0.3           | 0.34          | 0.93          | 0.39          | 0.95          | -             | 0.52          |
| matK_c1279 | 0.85          | 0.87          | 0.67          | 0.81          | -             | 0.87          | 0.84          | 0.87          | 0.76          | 0.85          | 0.87          |
| ndhA_c476  | -             | -             | -             | -             | -             | -             | -             | 0.84          | 0.78          | 0.87          | -             |
| ndhA_c962  | -             | -             | -             | -             | -             | -             | 0.47          | 0.72          | 0.44          | 0.5           | 0.36          |
| ndhB_c140  | -             | -             | -             | -             | -             | -             | 0.66          | 0.83          | 0.82          | 0.66          | -             |
| ndhB_c438  | -             | -             | 0.29          | -             | -             | -             | -             | -             | -             | -             | -             |
| ndhB_c458  | -             | -             | 0.44          | -             | -             | -             | 0.84          | 0.78          | 0.87          | 0.9           | -             |
| ndhB_c533  | -             | -             | 0.43          | 0.51          | 0.29          | 0.4           | 0.72          | 0.85          | 0.91          | 0.9           | 0.8           |
| ndhB_c577  | -             | -             | -             | -             | -             | -             | 0.68          | 0.48          | 0.47          | 0.67          | -             |
| ndhB_c695  | -             | -             | -             | -             | -             | -             | -             | 0.57          | 0.34          | 0.32          | 0.91          |
| ndhB_c728  | 0.35          | 0.8           | 0.84          | 0.76          | 0.75          | 0.67          | 0.9           | -             | 0.52          | -             | 0.86          |
| ndhB_c821  | 0.36          | 0.62          | 0.66          | 0.58          | 0.35          | 0.64          | 0.74          | 0.68          | 0.77          | 0.76          | -             |
| ndhB_c827  | -             | -             | 0.27          | -             | -             | -             | 0.5           | 0.75          | 0.69          | 0.9           | -             |
| ndhB_c1103 | -             | -             | -             | -             | -             | -             | -             | 0.75          | 0.85          | 0.42          | -             |
| ndhB_c1184 | -             | -             | -             | -             | -             | -             | -             | 0.9           | 0.61          | 0.92          | -             |
| ndhB_c1472 | -             | 0.48          | 0.31          | 0.31          | 0.3           | 0.21          | 0.79          | 0.83          | 0.91          | 0.86          | 0.84          |
| ndhC_c13   | -             | -             | 0.4           | -             | -             | -             | 0.61          | 0.66          | 0.55          | 0.8           | -             |
| ndhC_c311  | -             | 0.69          | 0.7           | 0.81          | -             | 0.71          | 0.45          | 0.82          | 0.57          | 0.67          | -             |
| ndhC_c323  | -             | -             | -             | -             | -             | -             | 0.24          | 0.67          | 0.41          | 0.56          | -             |
| ndhD_c5    | -             | -             | -             | -             | -             | -             | -             | 0.39          | -             | 0.44          | -             |
| ndhD_c386  | 0.36          | 0.3           | -             | 0.34          | 0.4           | 0.38          | 0.41          | 0.75          | 0.86          | 0.71          | -             |
| ndhD_c677  | -             | 0.81          | 0.44          | 0.42          | 0.34          | 0.33          | 0.4           | 0.91          | 0.76          | 0.85          | 0.78          |
| ndhD_c881  | -             | -             | 0.35          | -             | -             | -             | 0.68          | 0.89          | 0.9           | 0.88          | -             |
| ndhE_c287  | -             | -             | -             | -             | -             | -             | -             | -             | -             | 0.59          | -             |
| ndhF_c62   | -             | -             | -             | -             | -             | -             | 0.58          | 0.41          | -             | 0.4           | -             |
| ndhF_c259  | -             | -             | -             | -             | -             | -             | -             | 0.57          | 0.59          | 0.82          | -             |
| ndhF_c290  | -             | -             | -             | -             | -             | -             | 0.79          | 0.71          | 0.57          | 0.79          | -             |
| ndhF_c392  | -             | -             | -             | -             | -             | -             | 0.92          | -             | 0.7           | 0.94          | -             |
| ndhG_c155  | -             | -             | -             | -             | -             | -             | 0.55          | 0.55          | 0.91          | 0.54          | -             |
| ndhG_c347  | 0.46          | 0.83          | 0.53          | 0.8           | 0.64          | 0.75          | 0.83          | 0.81          | 0.9           | 0.93          | 0.88          |
| ndhI_c286  | -             | 0.66          | -             | -             | -             | -             | -             | -             | -             | -             | -             |
| ndhJ_c10   | -             | -             | -             | -             | -             | -             | -             | 0.24          | -             | -             | -             |
| ndhJ_c128  | 0.32          | 0.44          | 0.67          | 0.54          | 0.55          | 0.33          | 1             | 0.94          | 0.66          | 0.89          | 0.21          |
| ndhK_c65   | 0.42          | 0.75          | 0.85          | 0.88          | 0.83          | 0.87          | 0.83          | 0.94          | 0.79          | 0.84          | 0.43          |
| petB_c418  | 0.84          | 0.98          | 0.91          | 0.95          | -             | 0.99          | 0.99          | 0.96          | 0.96          | 0.98          | 0.99          |
| petB_c611  | 0.82          | 0.95          | 0.88          | 0.8           | 0.6           | 0.91          | 0.97          | 0.97          | 0.98          | 0.95          | 0.88          |
| petD_c481  | -             | 0.91          | 0.88          | 0.8           | 0.84          | 0.92          | 0.84          | 0.74          | 0.81          | 0.88          | 0.95          |
| petG_c56   | -             | 0.89          | 0.3           | 0.39          | 0.29          | 0.51          | 0.59          | 0.5           | 0.73          | 0.6           | 0.76          |

**Fig. S3 (continue)**

|             |      |      |      |      |      |      |      |      |      |      |      |
|-------------|------|------|------|------|------|------|------|------|------|------|------|
| petL_c5     | -    | -    | 0.73 | 0.53 | -    | -    | 0.46 | 0.62 | 0.57 | -    | 0.65 |
| petL_c44    | -    | -    | 0.25 | -    | -    | -    | 0.51 | -    | 0.67 | -    | -    |
| petL_c56    | -    | -    | 0.76 | 0.72 | 0.7  | -    | 0.25 | 0.8  | 0.91 | -    | 0.74 |
| psaI_c80    | 0.3  | -    | 0.79 | 0.76 | 0.35 | 0.82 | 0.83 | -    | 0.91 | 0.75 | 0.82 |
| psbB_c414   | -    | -    | -    | 0.3  | -    | -    | -    | 0.25 | -    | -    | -    |
| psbF_c77    | 0.88 | 0.99 | 0.97 | 0.9  | 0.97 | 0.96 | 0.83 | 0.91 | 0.82 | 0.96 | 0.97 |
| psbJ_c59    | 0.85 | 0.98 | -    | -    | -    | -    | 0.83 | 0.95 | -    | -    | 0.97 |
| rpl2_c183   | -    | 0.24 | -    | -    | -    | -    | 0.44 | -    | 0.28 | 0.33 | -    |
| rpl16_c12   | -    | 0.94 | 0.51 | 0.48 | 0.5  | 0.48 | 0.37 | 0.22 | 0.27 | -    | 0.58 |
| rpl20_c335  | -    | -    | -    | -    | 0.22 | 0.36 | -    | -    | 0.28 | -    | 0.28 |
| rpl20_c352  | -    | -    | 0.34 | 0.33 | 0.26 | 0.65 | -    | -    | -    | -    | -    |
| rpl22_c46   | -    | -    | -    | 0.32 | -    | -    | -    | 0.27 | -    | -    | -    |
| rpl23_c71   | 0.79 | 0.51 | 0.56 | 0.79 | 0.59 | 0.89 | 0.83 | 0.79 | 0.88 | 0.94 | 0.75 |
| rpl23_c89   | -    | -    | -    | -    | -    | -    | -    | 0.86 | 0.66 | -    | -    |
| rpoA_c200   | -    | 0.43 | 0.49 | 0.49 | 0.28 | 0.68 | 0.29 | 0.3  | 0.74 | 0.53 | 0.26 |
| rpoA_c368   | 0.24 | -    | 0.5  | 0.55 | 0.54 | -    | 0.48 | 0.3  | 0.63 | 0.42 | 0.34 |
| rpoA_c830   | 0.51 | 0.23 | -    | 0.32 | 1    | 0.44 | 0.43 | 0.21 | 0.71 | 0.45 | 0.21 |
| rpoB_c29    | 0.34 | 0.3  | 0.43 | 0.61 | 0.42 | 0.35 | 0.66 | 0.49 | 0.4  | 0.77 | 0.37 |
| rpoB_c338   | 0.6  | 0.63 | 0.47 | 0.7  | 0.55 | 0.85 | 0.38 | 0.59 | 0.58 | 0.76 | 0.57 |
| rpoB_c473   | 0.41 | 0.6  | 0.49 | 0.63 | 0.61 | 0.75 | 0.45 | 0.69 | 0.48 | 0.71 | 0.51 |
| rpoB_c551   | 0.54 | 0.72 | 0.82 | 0.9  | 0.78 | 0.91 | 0.85 | 0.91 | 0.45 | 0.96 | 0.85 |
| rpoB_c623   | 0.51 | 0.42 | 0.72 | 0.68 | 0.67 | 0.72 | 0.83 | 0.79 | 0.41 | 0.78 | 0.71 |
| rpoB_c2426  | 0.73 | 0.68 | 0.78 | 0.72 | 0.58 | 0.79 | 0.87 | 0.8  | 0.71 | 0.88 | 0.66 |
| rpoC1_c41   | 0.73 | 0.7  | 0.83 | 0.81 | 0.69 | 0.91 | 0.92 | 0.9  | 0.92 | 0.76 | 0.86 |
| rpoC1_c500  | -    | -    | -    | -    | -    | -    | -    | 0.28 | 0.28 | 0.5  | 0.21 |
| rpoC1_c629  | 0.74 | 0.43 | 0.67 | 0.53 | 0.63 | 0.64 | 0.58 | 0.69 | 0.69 | 0.62 | 0.9  |
| rpoC1_c647  | 0.83 | 0.54 | 0.95 | 0.9  | -    | 0.9  | 0.66 | 0.94 | 0.94 | 0.93 | 0.83 |
| rpoC2_c2825 | -    | 0.74 | 0.62 | 0.74 | 0.54 | 0.74 | 1    | 0.73 | 0.81 | 0.73 | 0.73 |
| rps12_c221  | 0.85 | 0.92 | 0.94 | 0.67 | 0.56 | 0.79 | 0.85 | 0.87 | 0.8  | 0.7  | 0.95 |
| rps14_c149  | 0.73 | 0.87 | 0.69 | 0.74 | 0.72 | 0.81 | 0.69 | 0.9  | 0.93 | 0.85 | 0.96 |
| rps16_c143  | 0.84 | 0.88 | 0.59 | 0.65 | 0.39 | 0.77 | 1    | 0.82 | 0.73 | 0.79 | 0.65 |
| rps2_c134   | 0.28 | 0.32 | 0.25 | 0.33 | 0.22 | 0.24 | -    | 0.52 | 0.69 | 0.43 | 0.43 |
| rps3_c583   | 0.86 | 0.98 | 0.64 | 0.91 | 0.83 | 0.96 | 0.73 | 0.78 | 0.9  | 0.92 | -    |
| rps7_c253   | 0.96 | 0.83 | 0.91 | 0.96 | 0.48 | 0.94 | 0.94 | 0.97 | 0.95 | 0.9  | 0.93 |
| rps8_c182   | 0.65 | 0.5  | 0.39 | 0.61 | 0.2  | 0.79 | 0.52 | -    | 0.74 | 0.65 | 0.33 |
| ycf1_c5336  | 0.35 | 0.54 | 0.41 | 0.7  | 0.66 | 0.84 | 0.79 | 0.36 | 0.3  | -    | 0.74 |
| ycf3_c44    | 0.44 | 0.87 | 0.82 | 0.9  | 0.76 | 0.88 | 0.85 | 0.74 | 0.82 | 0.71 | 0.89 |
| ycf3_c185   | 0.6  | 0.95 | 0.8  | 0.75 | 0.76 | 0.9  | 0.87 | 0.89 | 0.87 | 0.84 | 0.73 |
| ycf3_c191   | 0.41 | 0.96 | 0.91 | 0.75 | 0.56 | 0.82 | 0.72 | 0.81 | 0.78 | 0.84 | 0.71 |
| ycf4_c254   | -    | 0.81 | 0.86 | 0.88 | -    | 0.82 | 0.62 | 0.96 | 0.92 | 0.84 | -    |

Editing efficiency (edited reads/total reads)

0.05-0.2 0.2-0.4 0.4-0.6 0.6-0.8 0.8-1.0
